# Supplementary material for: Immunotherapy against the radial glia marker GLAST effectively triggers specific antitumor effectors without autoimmunity
Source: PubMed Central journal article supplement — Oncoimmunology. 2012 Sep 1;1(6):884–93. doi: 10.4161/onci.20637 (PMC3489744; doi:10.4161/onci.20637), 2012-09-01
Supplement: onci-1-884-s01.pdf [file onci-1-884-s01.pdf]

**Supplemental Materials to:**

**Immunotherapy against the radial glia marker GLAST effectively triggers specific antitumor effectors without autoimmunity**

Gabriele Cantini, Federica Pisati, Sara Pessina, Gaetano Finocchiaro and Serena Pellegatta

OncoImmunology 2012; 1(8); DOI: 10.4161.onci.20637

**Figure S1. GLAST-peptide administration increased significantly peripheral immune cells**

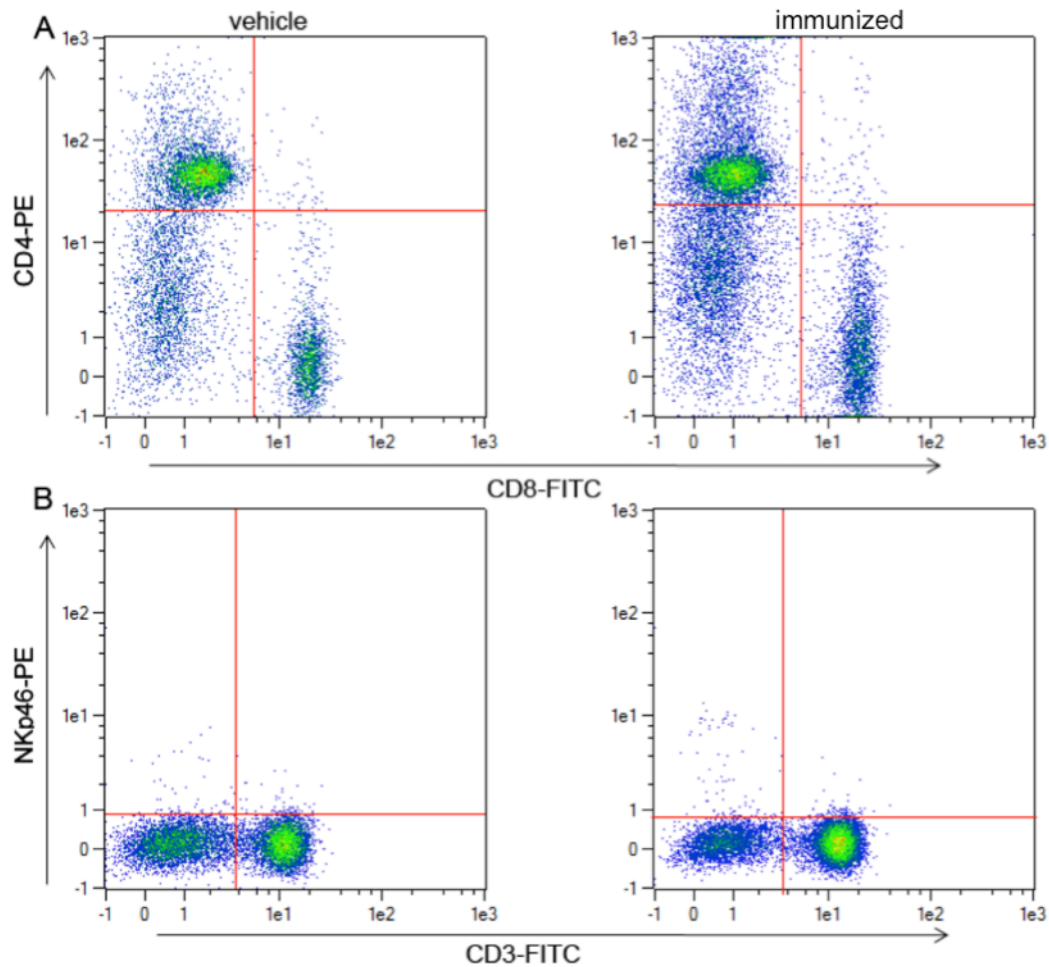

In cervical lymph nodes from immunized mice the percentage of CD4, CD8-T and NK cells increased significantly when compared to controls: A. CD4<sup>+</sup> 23.50 ± 2.10 vs. 15.20 ± 0.10, p = 0.04; CD8<sup>+</sup> cells 13.60 ± 1.40 vs. 5.10 ± 0.70, p = 0.01; B. CD3<sup>-</sup> NKp46<sup>+</sup> cells 2.00 ± 0.50 vs. 0.20 ± 0.07, p = 0.01 immunized vs. vehicle mice respectively.

The panels show representative dot plots obtained from three different evaluations 15 days after tumor implantation.

**Figure S2. Nestin/GLAST double positive cells disappeared in gliomas from immunized mice**

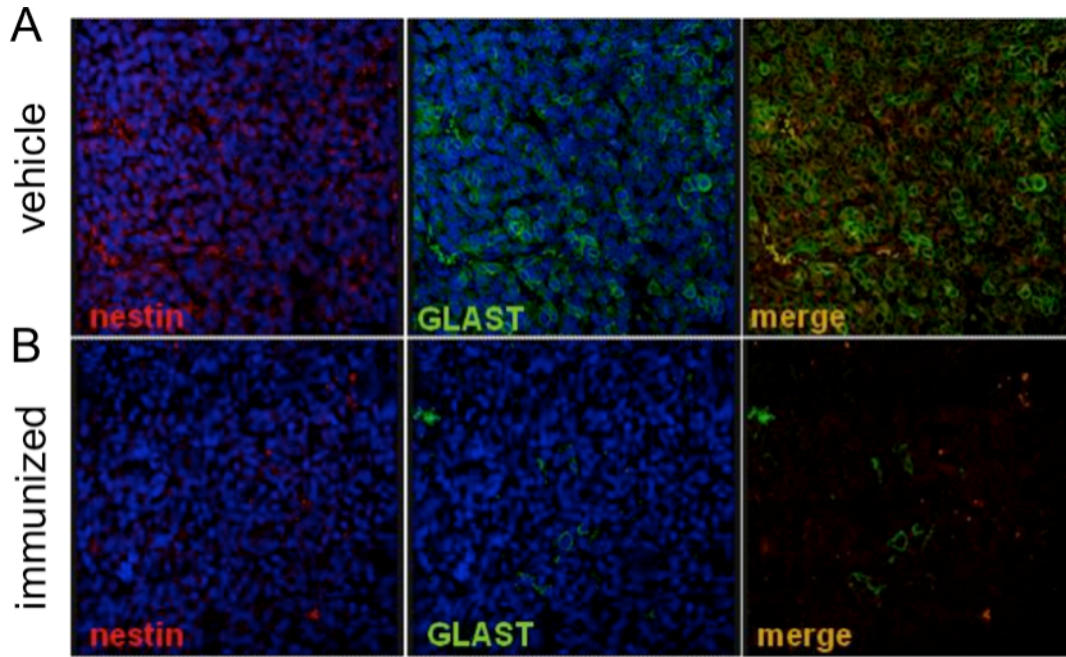

- A. Gliomas from control mice treated with vehicle investigated 22 days after tumor implantation showed high levels of nestin (red) and GLAST (green) double positive cells.
- B. In gliomas from mice immunized with GLAST peptides and sacrificed on day 22 double positive cells disappeared.

Three representative mice for each group have been investigated and representative images are displayed.

## Sequences of primers for SYBR® Green Chemistry

- b2m:** fw 5'-GAATGGGAAGCCGAACATAC-3';  
rev 5'-CCGTTCTTCAGCATTGGAT-3'
- IFN- $\gamma$ :** fw 5'-ATCTGGAGGAACTGGCAAAA-3'  
rev 5'-TTCAAGACTTCAAAGAGTCTGAGGTA-3'
- TNF- $\alpha$ :** fw 5'-GCCACCACGCTCTTCTGTCTA-3'  
rev 5'-TGAGGGTCTGGGCCATAGAA-3'
- TGF- $\beta$ :** fw 5'-CTAATGGTGGACCGCAACAAC-3'  
rev 5'-GCACTGCTTCCCGAATGTCT-3'
- Granzyme B:** fw 5'-GCTGCTCACTGTGAAGGAAGT-3'  
rev 5'-TGGGGAATGCATTTTACCAT-3'
- E4BP4:** fw 5'-AAAACAACGAAGCTGCCAAA-3'  
rev 5'-CCAAAACCAGGTCATTGAGG-3'
- CD49d:** fw 5'-CAAACCAGACCTGCGAACA-3'  
rev 5'-TGTCTTCCCACAAGGCTCTC-3'
- CXCL10:** fw 5'-GCTGCCGTCATTTTCTGC-3'  
rev 5'-TCTCACTGGCCCGTCATC-3'
- CCL5:** fw 5'-CCCTCACCATCATCCTCACT-3'  
rev 5'-GAGAGGTAGGCAAAGCAGCA-3'
- CCL2:** fw 5'-CATCCACGTGTTGGCTCA-3'  
rev 5'-GATCATCTTGCTGGTGAATGAGT-3'

**CCL4:** fw 5'-GCCCTCTCTCTCCTCTTGCT-3'

rev 5'-GAGGGTCAGAGCCCATTG-3'

**CCL3:** fw 5'-CAAGTCTTCTCAGCGCCATA-3'

rev 5'-GGAATCTTCCGGCTGTAGG-3'

**NKG2DL:** fw 5'-TGAAGTCACCTGTGTTTATGCAG-3'

rev 5'-CACTGTCAAAGAGTCATCCAACA-3'
